# Supplementary material for: An overview of the quality assurance programme for HIV rapid testing in South Africa: Outcome of a 2-year phased implementation of quality assurance program
Source: PubMed Central journal article supplement (PMC6762059; doi:10.1371/journal.pone.0221906), 2019-09-26
Supplement: pone.0221906.s001.pdf [file pone.0221906.s001.pdf]

# the Stepwise Process for Improving the Quality of HIV Rapid Testing (SPI-RT) Checklist

---

Version 2.0

### SPI-RT Checklist

|            | SECTION QUESTIONS                                                                                                    | YES | PARTIAL | NO | Comment |
|------------|----------------------------------------------------------------------------------------------------------------------|-----|---------|----|---------|
| <b>1.0</b> | <b>PERSONNEL TRAINING AND CERTIFICATION</b>                                                                          |     |         |    |         |
| 1.1.       | Have the providers received a comprehensive training on HIV rapid test?                                              |     |         |    |         |
| 1.2.       | Are the providers trained on the use of standardized registers/logbooks?                                             |     |         |    |         |
| 1.3.       | Are the providers trained on proficiency testing (PT) process?                                                       |     |         |    |         |
| 1.4.       | Are the providers trained on quality control (QC) process?                                                           |     |         |    |         |
| 1.5.       | Are the providers trained on safety and waste management procedures?                                                 |     |         |    |         |
| 1.6.       | Are there signed records of all procedures read and understood by HIV rapid testing personnel?                       |     |         |    |         |
| 1.7.       | Is periodic (i.e. every two years) HIV rapid test refresher training offered for testing personnel?                  |     |         |    |         |
| 1.8.       | Is there evidence that providers received adequate, specific training prior to patient testing to ensure competence? |     |         |    |         |
| 1.9.       | If there is a national certification program, are providers certified?                                               |     |         |    |         |
| 1.10.      | Are only certified providers allowed to perform testing?                                                             |     |         |    |         |
| 1.11.      | Are certified providers required re-certifications periodically (i.e. every two years)?                              |     |         |    |         |
| <b>2.0</b> | <b>PHYSICAL FACILITY</b>                                                                                             |     |         |    |         |
| 2.1.       | Is there a designated area for HIV testing?                                                                          |     |         |    |         |
| 2.2.       | Is the testing area clean and organized for HIV rapid testing?                                                       |     |         |    |         |

## SPI-RT Checklist

|            |                                                                                                                                                                               |  |  |  |  |
|------------|-------------------------------------------------------------------------------------------------------------------------------------------------------------------------------|--|--|--|--|
| 2.3.       | Is sufficient lighting available in the designated testing area?                                                                                                              |  |  |  |  |
| 2.4.       | Is there continuous power supply available (If the kits are required to be stored in a refrigerator)?                                                                         |  |  |  |  |
| 2.5.       | Is there sufficient and secure storage space for test kits and other consumables?                                                                                             |  |  |  |  |
| <b>3.0</b> | <b>SAFETY</b>                                                                                                                                                                 |  |  |  |  |
| 3.1        | Are there SOPs and/or job aides in place to ensure that personnel know to implement safety practices (apron, gloves, etc.)?                                                   |  |  |  |  |
| 3.2        | Are there SOPs and/or job aides in place on how to dispose of infectious and non-infectious waste?                                                                            |  |  |  |  |
| 3.3        | Are there SOPs and/or job aides in place to manage spills of blood and other body fluids?                                                                                     |  |  |  |  |
| 3.4        | Are there SOPs and/or job aides in place to address occupational exposure to potentially infectious body fluids through a needle stick injury, splash or other sharps injury? |  |  |  |  |
| 3.5        | Are appropriate safety gears (i.e. gloves, lab coats or aprons) available for the providers?                                                                                  |  |  |  |  |
| 3.6        | Are appropriate safety gears (i.e. gloves, lab coats or aprons) consistently used by the providers?                                                                           |  |  |  |  |
| 3.7        | Is there clean water and soap available for hand washing?                                                                                                                     |  |  |  |  |
| 3.8        | Is there an appropriate disinfectant (i.e. bleach, alcohol, etc.) available?                                                                                                  |  |  |  |  |
| 3.9        | Are sharps, infectious and non-infectious waste handled properly?                                                                                                             |  |  |  |  |
| <b>4.0</b> | <b>PRE-TESTING PHASE</b>                                                                                                                                                      |  |  |  |  |

### SPI-RT Checklist

|            |                                                                                                                            |  |  |  |  |
|------------|----------------------------------------------------------------------------------------------------------------------------|--|--|--|--|
| 4.1        | Are there national testing guidelines specific to the program available at the testing site?                               |  |  |  |  |
| 4.2        | Is the national testing algorithm being used?                                                                              |  |  |  |  |
| 4.3        | Are there SOPs and/or job aides in place for each HIV rapid test used in the testing algorithm?                            |  |  |  |  |
| 4.4        | Are only MOH approved HIV rapid kits available for use?                                                                    |  |  |  |  |
| 4.5        | Are test kits stored according to manufacturer recommendations?                                                            |  |  |  |  |
| 4.6        | Is there a process in place for inventory management (receiving and monitoring supplies, handling expired kits, etc.)?     |  |  |  |  |
| 4.7        | Are reagents used within expiration date (First Expired, First Out principle)?                                             |  |  |  |  |
| 4.8        | Are test kits labeled with date received, date opened, and initials?                                                       |  |  |  |  |
| 4.9        | Is there a process in place for alternative testing algorithm in case of expired or shortage of test kit(s)?               |  |  |  |  |
| 4.10       | Are job aides on specimen collection available and posted at the facility?                                                 |  |  |  |  |
| 4.11       | Are there sufficient supplies available for specimen collection (i.e. lancets, gauze, alcohol swabs, plaster, etc.)?       |  |  |  |  |
| 4.12       | Are sharps (e.g., lancets and needles) disposed into appropriate containers after the finger prick procedure is performed? |  |  |  |  |
| <b>5.0</b> | <b>TESTING PHASE</b>                                                                                                       |  |  |  |  |
| 5.1        | Are job aides on HIV testing procedures available and posted at the testing site?                                          |  |  |  |  |
| 5.2        | Are timers available and used routinely for HIV rapid testing?                                                             |  |  |  |  |
| 5.3        | Are test devices properly labeled with client ID during testing?                                                           |  |  |  |  |

### SPI-RT Checklist

|            |                                                                                                                                                                                                               |  |  |  |  |
|------------|---------------------------------------------------------------------------------------------------------------------------------------------------------------------------------------------------------------|--|--|--|--|
| 5.4        | Are sample collection devices (capillary tube, loop, disposable pipettes etc.) used accurately?                                                                                                               |  |  |  |  |
| 5.5        | Are testing procedures adequately followed (during observation)?                                                                                                                                              |  |  |  |  |
| 5.6        | Are positive and negative quality control (QC) specimens routinely used (i.e. daily or weekly) according to country guidelines?                                                                               |  |  |  |  |
| 5.7        | Is QC results properly recorded?                                                                                                                                                                              |  |  |  |  |
| 5.8        | Are appropriate steps documented and taken when QC results are incorrect and/or invalid?                                                                                                                      |  |  |  |  |
| 5.9        | Are QC records reviewed by a head of facility/testing site routinely?                                                                                                                                         |  |  |  |  |
| <b>6.0</b> | <b>POST-TESTING PHASE</b>                                                                                                                                                                                     |  |  |  |  |
| 6.1        | Are test results properly recorded in register/logbook?                                                                                                                                                       |  |  |  |  |
| 6.2        | Are test devices disposed of properly after testing?                                                                                                                                                          |  |  |  |  |
| 6.3        | Is testing area properly cleaned and disinfected?                                                                                                                                                             |  |  |  |  |
| 6.4        | Are waste containers emptied regularly?                                                                                                                                                                       |  |  |  |  |
| <b>7.0</b> | <b>DOCUMENTS AND RECORDS</b>                                                                                                                                                                                  |  |  |  |  |
| 7.1        | Is there a national standardized HIV rapid testing register/logbook available and in use?                                                                                                                     |  |  |  |  |
| 7.2*       | Are all the elements in the HIV rapid testing logbook/register captured correctly (i.e., kit names, lot numbers, expiration dates, client demographics, tester name, individual and final HIV results, etc.)? |  |  |  |  |
| 7.3        | Are invalid test results recorded in the register/logbook, and then repeated?                                                                                                                                 |  |  |  |  |

### SPI-RT Checklist

|            |                                                                                                                  |  |  |  |  |
|------------|------------------------------------------------------------------------------------------------------------------|--|--|--|--|
| 7.4*       | Is the end of each page total summary for the register/logbooks complied accurately?                             |  |  |  |  |
| 7.5        | Are all registers/logbooks and other documents kept in a secure location?                                        |  |  |  |  |
| 7.6        | Are registers/logbooks properly labeled and archived when full?                                                  |  |  |  |  |
| 7.7        | Does the testing site ensure confidentiality of client information throughout all phases of the testing process? |  |  |  |  |
| <b>8.0</b> | <b>EXTERNAL QUALITY ASSESSMENT (PT, RETESTING AND SITE SUPERVISION)</b>                                          |  |  |  |  |
| 8.1        | Is the testing site enrolled in an EQA/PT program?                                                               |  |  |  |  |
| 8.2        | Do all providers at the testing site participate in the EQA/PT program?                                          |  |  |  |  |
| 8.3        | Does head of facility or testing review EQA/PT results before submission to NRL?                                 |  |  |  |  |
| 8.4        | Is EQA/PT feedback report received and reviewed?                                                                 |  |  |  |  |
| 8.5        | Does the site implement corrective action in case of unsatisfactory results?                                     |  |  |  |  |
| 8.6*       | Does the site collect samples for retesting (i.e. collection of DBS every 20 <sup>th</sup> client)?              |  |  |  |  |
| 8.7*       | Are DBS samples collected properly (i.e., at least 3 complete circles)                                           |  |  |  |  |
| 8.8*       | Are DBS samples stored properly (i.e., away from sun light, separated by glassine paper, desiccant, etc.)        |  |  |  |  |
| 8.9*       | Are the IDs of DBS samples sent for retesting recorded?                                                          |  |  |  |  |
| 8.10*      | Are the DBS results, upon receipt from NRL, recorded in the HIV register/logbook?                                |  |  |  |  |

### SPI-RT Checklist

|       |                                                                              |  |  |  |  |
|-------|------------------------------------------------------------------------------|--|--|--|--|
| 8.11* | Does the site receive periodically supervisory team?                         |  |  |  |  |
| 8.12* | Is a direct observation of client testing performed during site supervision? |  |  |  |  |
| 8.13  | Are providers retrained during site supervision?                             |  |  |  |  |
